# Supplementary material
Source: publisher site journal article supplement (https://www.dovepress.com/article/249009)
Supplement: Supplementary file 1 [file get_supplementary_file.php]

---

# Supporting Information

## Intelligent drug delivery microparticles with visual stimuli-responsive structural color changes

### Supporting Figures:

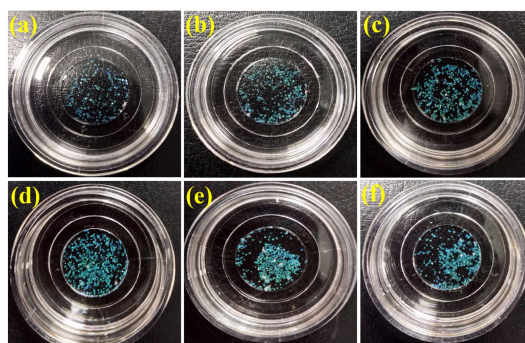

**Figure S1.** (a-f) The images of pNIPAM hydrogel inverse opal particles with different PEGDA concentration. The concentrations from a to b were 2%, 4%, 6%, 8%, 10%, 12% and 14% (v/v), respectively.

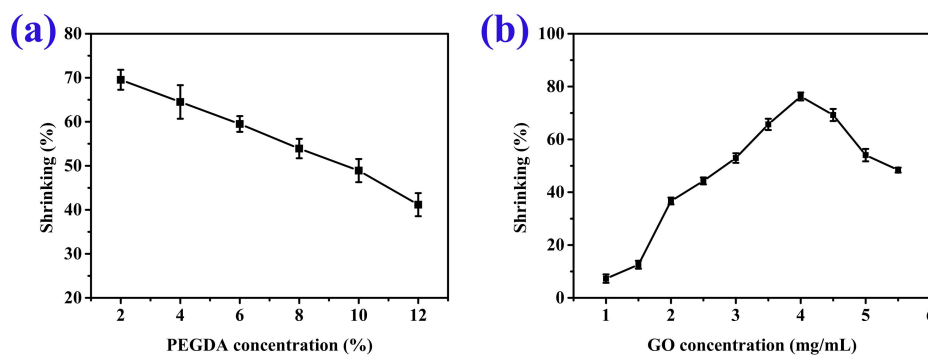

**Figure S2.** The effects of the concentration of PEGDA (a) and GO (b) on the volume shrinkage ratio of the composite hydrogel (n=3).

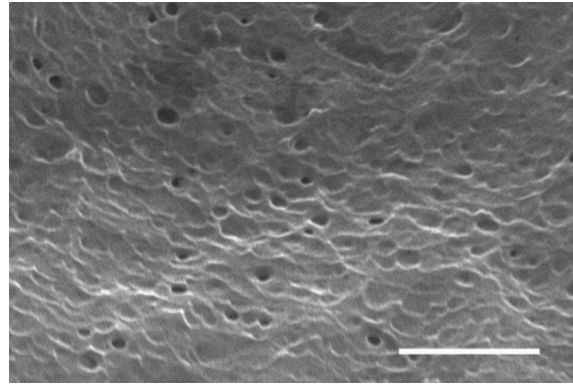

**Figure S3.** The SEM images of collapsed structure of inverse opal scaffold. The scale bars are 1  $\mu\text{m}$ .

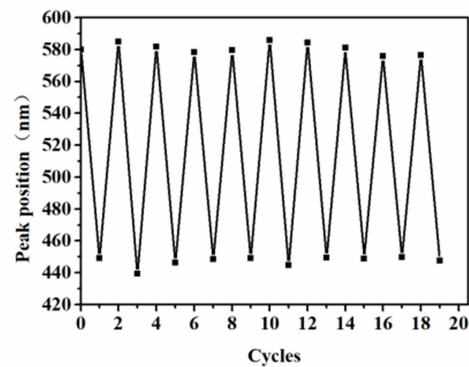

**Figure S4.** Reversible changes of the reflection peaks of the inverse opal microparticles. The microparticles showed good durability during more than twenty cycles.

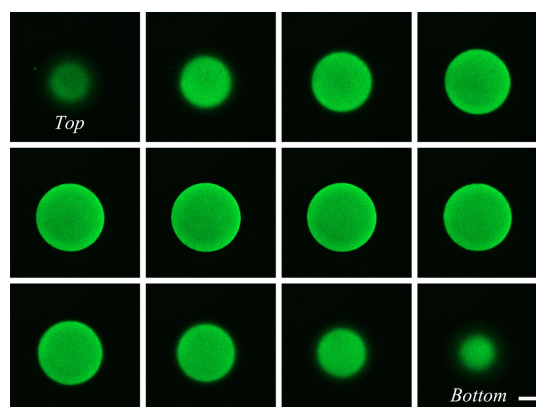

**Figure S5.** Laser scanning confocal microscope images of FITC-dextran loaded inverse opal microparticles with 0.2% Sodium alginate. Image optical slices (parallel to horizontal) were taken along the  $z$  direction (from the top of the microparticles to the bottom). The scale bar is 50  $\mu\text{m}$ .

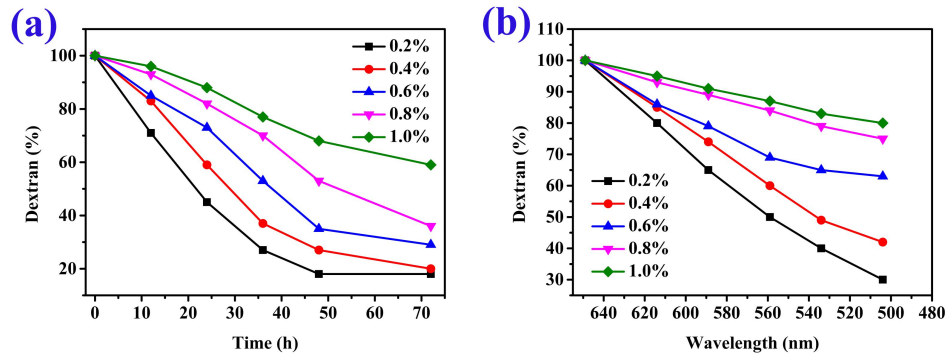

**Figure S6.** (a) Cumulative release curves of the FITC-dextran loaded inverse opal microparticles with different calcium alginate concentrations (w/v) at room temperature. (b) The relationships of the reflection peak positions and the drug release level at different calcium alginate concentrations.

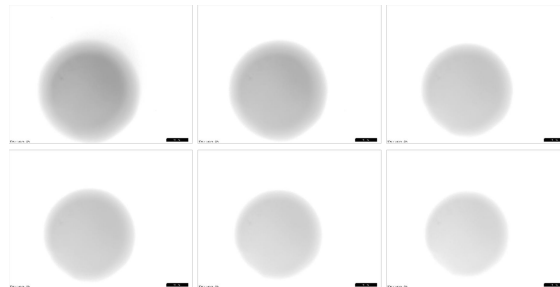

**Figure S7.** The 8-bit gray images of FITC-dextran loaded inverse opal microparticles after Image J processing. The scale bars are 50 μm.
